# Supplementary material
Source: Springer Nature journal article supplement (https://www.springermedizin.de/resource/supplementary/12961_2009_101_MOESM3_ESM.pdf/9571416)
Supplement: MOESM3 [file 9571416]

1. Power and org. culture

2. Conditions for implementing KT in org. processes

5. Links between different forms of knowledge

4. Contextualization of KT to the org. setting

3. Strategies adapted to the users' needs

7. Optimal modalities for collaboration between researchers and practitioners

8. Evaluation of effects and impacts

6. Characteristics, roles and dynamics of the actors

9. Theories, concepts, methods and measures of KT

10. Ethical issues

11. KT in the public arena
